# Supplementary material for: MicroRNA determinants of neuroendocrine differentiation in metastatic castration-resistant prostate cancer
Source: Springer Nature journal article supplement (doi:10.1038/s41388-020-01493-8), 2020-10-09

Fig. S4 Differential expression of microRNA isoforms (iso-miRs) in neuroendocrine differentiation in CRPC (related to Fig. 3)

A

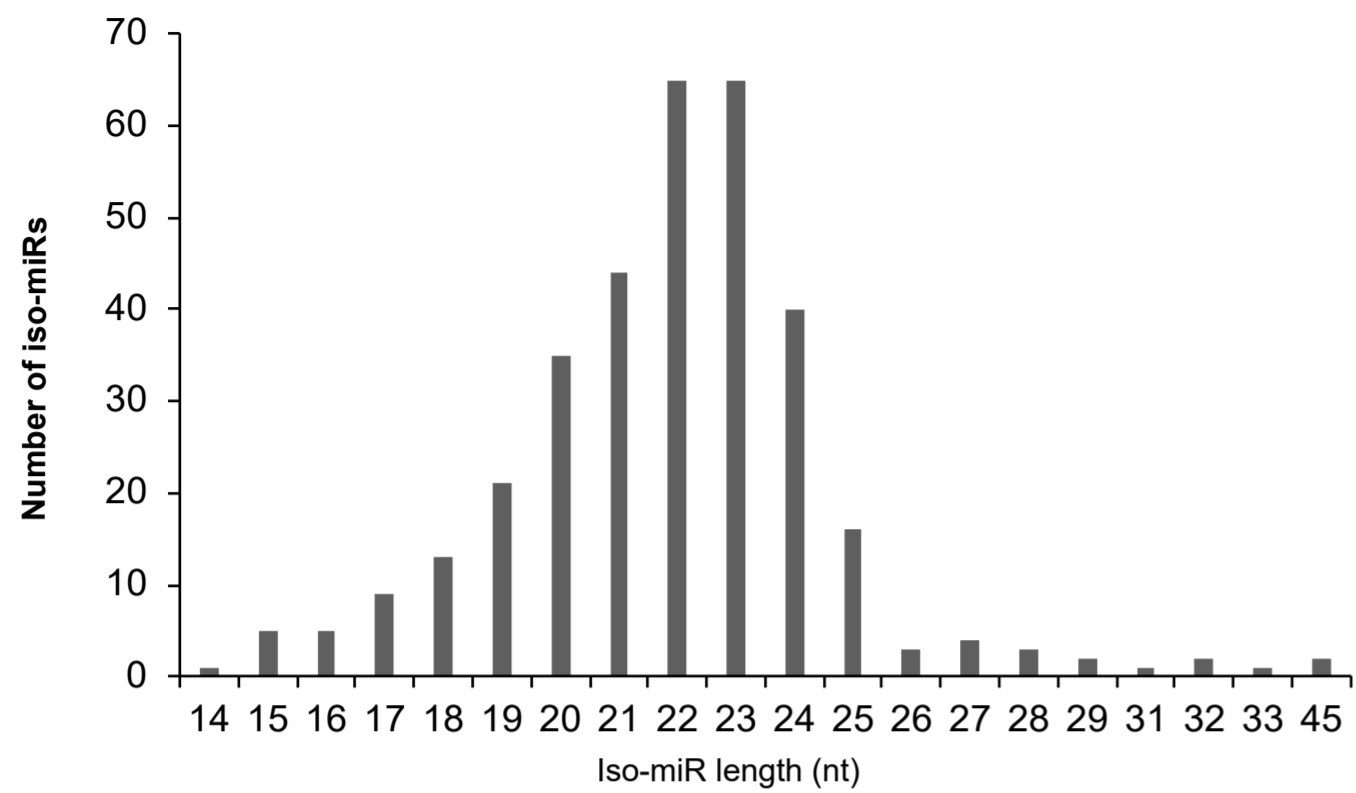

B

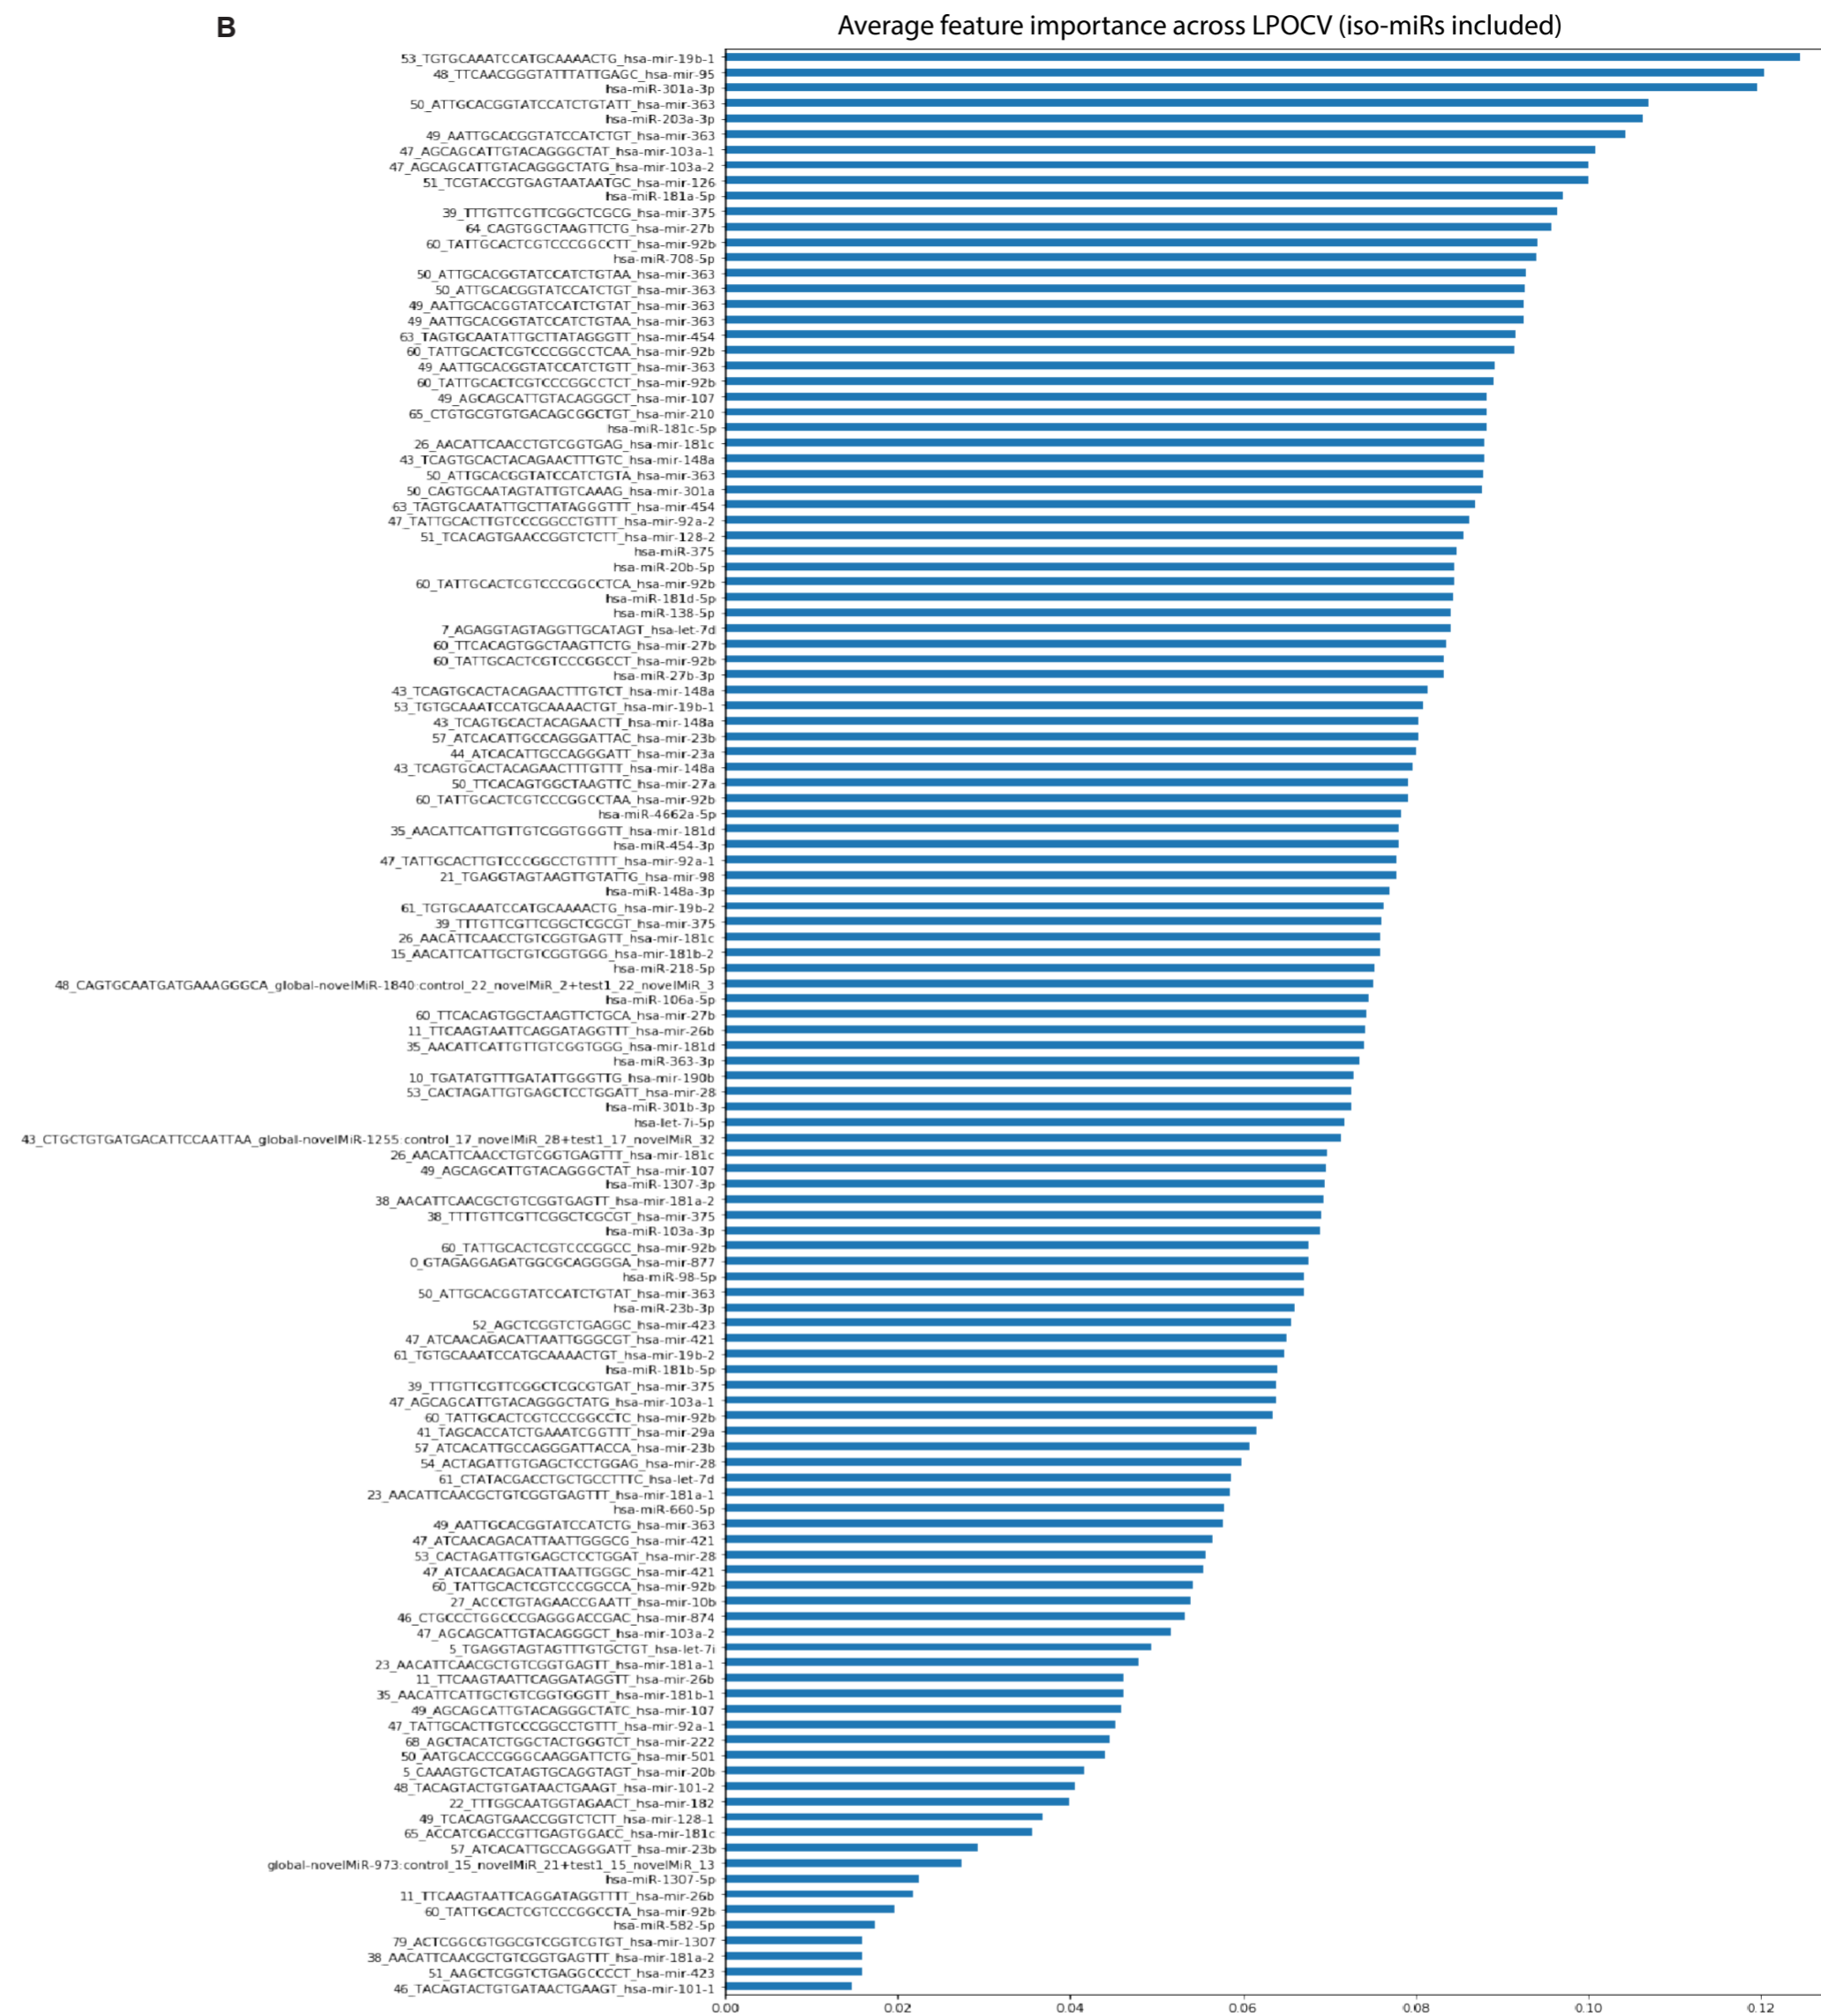

Supplement: 41388_2020_1493_MOESM4_ESM.pdf [file 41388_2020_1493_MOESM4_ESM.pdf]
