# Supplementary material for: MicroRNA determinants of neuroendocrine differentiation in metastatic castration-resistant prostate cancer
Source: Springer Nature journal article supplement (doi:10.1038/s41388-020-01493-8), 2020-10-09
Supplement: 41388_2020_1493_MOESM7_ESM.pdf [file 41388_2020_1493_MOESM7_ESM.pdf]

**Table S1 Clinicopathologic characteristics of prostate cancer patients (Cohort 1+2)**

| <b>Patient Characteristics</b>                                                                                                            | <b>CRPC-Adeno</b>  | <b>CRPC-NE</b>  |
|-------------------------------------------------------------------------------------------------------------------------------------------|--------------------|-----------------|
| Number of patients                                                                                                                        | 39                 | 8               |
| Median age at diagnosis in years (range)                                                                                                  | 65 (45-80)         | 63 (57-67)      |
| Median age at death in years (range)                                                                                                      | 72 (53-90)         | 71 (60-87)      |
| Median survival after diagnosis in years (range)                                                                                          | 8 (1-25)           | 5 (1-13)        |
| Median PSA at death in ng/mL (range)                                                                                                      | 620.5 (5.63-15000) | 3.3 (0.15-86.3) |
| Race: Caucasians ( <b>C</b> ) Others including African American, Hispanics, Asians ( <b>O</b> )                                           | <b>C-34 O-5</b>    | <b>C-7*</b>     |
|                                                                                                                                           |                    |                 |
| <b>Gleason Score</b>                                                                                                                      |                    |                 |
| 4-6                                                                                                                                       | 5                  | 1               |
| <b>7</b>                                                                                                                                  | 17                 | 2               |
| 8-10                                                                                                                                      | 15                 | 5               |
| Unknown                                                                                                                                   | 2                  | -               |
|                                                                                                                                           |                    |                 |
| <b>Metastatic sites</b>                                                                                                                   |                    |                 |
| Lung                                                                                                                                      | 4                  | 2               |
| Liver                                                                                                                                     | 10                 | 1               |
| Lymph node (LN)                                                                                                                           | 10                 | 1               |
| Others (Skin, Retroperitoneal, Periaortic LN, Retroperitoneal LN, Diaphragm, Retrosternal LN, Spleen, Omentum, Cortical, Pelvic LN, Mass) | 15                 | 4               |
|                                                                                                                                           |                    |                 |
| <b>Androgen Ablation Therapy</b>                                                                                                          |                    |                 |

|                                                                    |          |            |
|--------------------------------------------------------------------|----------|------------|
| Number of patients receiving androgen ablation therapy (%)         | 39 (100) | 8 (100)    |
| Number of patients receiving Enzalutamide, Abiraterone or both (%) | 9 (23)   | 2 (25)     |
|                                                                    |          |            |
| <b>Other Therapies</b>                                             |          |            |
| Ketoconazole (%)                                                   | 18 (46)  | 1 (13)     |
| DES (%)                                                            | 15 (38)  | 1 (13)     |
| Corticosteroids (%)                                                | 30 (77)  | 4 (50)     |
| Estramustine (%)                                                   | 5 (13)   | 1 (13)     |
| Taxotere (%)                                                       | 31       | 79) 4 (50) |

\*Race not known for 1 case
