# Supplementary material for: MicroRNA determinants of neuroendocrine differentiation in metastatic castration-resistant prostate cancer
Source: Springer Nature journal article supplement (doi:10.1038/s41388-020-01493-8), 2020-10-09
Supplement: 41388_2020_1493_MOESM11_ESM.pdf [file 41388_2020_1493_MOESM11_ESM.pdf]

|    |               |         |          |          |          |          |           |          |          |        |   |         |          |         |          |          |          |          |          |          |          |          |           |          |     |     |         |           |          |
|----|---------------|---------|----------|----------|----------|----------|-----------|----------|----------|--------|---|---------|----------|---------|----------|----------|----------|----------|----------|----------|----------|----------|-----------|----------|-----|-----|---------|-----------|----------|
| 68 | AGCTCAATCTCGC | 5179136 | 1.509442 | 5.941255 | 3.891171 | 3.479177 | 12.849156 | 2.079375 | 3.558239 | 4.6983 | 0 | 176.409 | 0.906366 | 1.30209 | 0.753483 | 1.970718 | 0.594486 | 3.574338 | 3.968552 | 8.895657 | 15.59816 | 12.9133  | -0.01187  | 1.115347 | NaN | NaN | Outlier | 12.96625  | 12.86002 |
| 69 | AGCTCAATCTCGC | 5179136 | 1.509442 | 5.941255 | 3.891171 | 3.479177 | 12.849156 | 2.079375 | 3.558239 | 4.6983 | 0 | 176.409 | 0.906366 | 1.30209 | 0.753483 | 1.970718 | 0.594486 | 3.574338 | 3.968552 | 8.895657 | 15.59816 | 47.2721  | 0.22311   | 1.10191  | NaN | NaN | Outlier | 48.8994   | 51.1948  |
| 70 | AGCTCAATCTCGC | 5179136 | 1.509442 | 5.941255 | 3.891171 | 3.479177 | 12.849156 | 2.079375 | 3.558239 | 4.6983 | 0 | 176.409 | 0.906366 | 1.30209 | 0.753483 | 1.970718 | 0.594486 | 3.574338 | 3.968552 | 8.895657 | 15.59816 | 22.7820  | 0.18873   | 1.01205  | NaN | NaN | Outlier | 24.0074   | 25.0564  |
| 71 | AGCTCAATCTCGC | 5179136 | 1.509442 | 5.941255 | 3.891171 | 3.479177 | 12.849156 | 2.079375 | 3.558239 | 4.6983 | 0 | 176.409 | 0.906366 | 1.30209 | 0.753483 | 1.970718 | 0.594486 | 3.574338 | 3.968552 | 8.895657 | 15.59816 | 38.05204 | 0.19348   | 1.09848  | NaN | NaN | Outlier | 39.15548  | 40.9456  |
| 72 | AGCTCAATCTCGC | 5179136 | 1.509442 | 5.941255 | 3.891171 | 3.479177 | 12.849156 | 2.079375 | 3.558239 | 4.6983 | 0 | 176.409 | 0.906366 | 1.30209 | 0.753483 | 1.970718 | 0.594486 | 3.574338 | 3.968552 | 8.895657 | 15.59816 | 1.87632  | -1.52964  | 1.188181 | NaN | NaN | Outlier | 4.73517   | 1.640096 |
| 73 | AGCTCAATCTCGC | 5179136 | 1.509442 | 5.941255 | 3.891171 | 3.479177 | 12.849156 | 2.079375 | 3.558239 | 4.6983 | 0 | 176.409 | 0.906366 | 1.30209 | 0.753483 | 1.970718 | 0.594486 | 3.574338 | 3.968552 | 8.895657 | 15.59816 | 1.65667  | -0.47266  | 1.18031  | NaN | NaN | Outlier | 1.92547   | 1.387866 |
| 74 | AGCTCAATCTCGC | 5179136 | 1.509442 | 5.941255 | 3.891171 | 3.479177 | 12.849156 | 2.079375 | 3.558239 | 4.6983 | 0 | 176.409 | 0.906366 | 1.30209 | 0.753483 | 1.970718 | 0.594486 | 3.574338 | 3.968552 | 8.895657 | 15.59816 | 0.00000  | 0.00000   | 1.00000  | NaN | NaN | Outlier | 0.00000   | 0.00000  |
| 75 | AGCTCAATCTCGC | 5179136 | 1.509442 | 5.941255 | 3.891171 | 3.479177 | 12.849156 | 2.079375 | 3.558239 | 4.6983 | 0 | 176.409 | 0.906366 | 1.30209 | 0.753483 | 1.970718 | 0.594486 | 3.574338 | 3.968552 | 8.895657 | 15.59816 | 3.62770  | -0.7184   | 1.01313  | NaN | NaN | Outlier | 4.52179   | 2.74204  |
| 76 | AGCTCAATCTCGC | 5179136 | 1.509442 | 5.941255 | 3.891171 | 3.479177 | 12.849156 | 2.079375 | 3.558239 | 4.6983 | 0 | 176.409 | 0.906366 | 1.30209 | 0.753483 | 1.970718 | 0.594486 | 3.574338 | 3.968552 | 8.895657 | 15.59816 | 3.359458 | -0.3465   | 1.073073 | NaN | NaN | Outlier | 3.760958  | 2.956204 |
| 77 | AGCTCAATCTCGC | 5179136 | 1.509442 | 5.941255 | 3.891171 | 3.479177 | 12.849156 | 2.079375 | 3.558239 | 4.6983 | 0 | 176.409 | 0.906366 | 1.30209 | 0.753483 | 1.970718 | 0.594486 | 3.574338 | 3.968552 | 8.895657 | 15.59816 | 47.26234 | -1.12521  | 1.04423  | NaN | NaN | Outlier | 48.37071  | 49.93937 |
| 78 | AGCTCAATCTCGC | 5179136 | 1.509442 | 5.941255 | 3.891171 | 3.479177 | 12.849156 | 2.079375 | 3.558239 | 4.6983 | 0 | 176.409 | 0.906366 | 1.30209 | 0.753483 | 1.970718 | 0.594486 | 3.574338 | 3.968552 | 8.895657 | 15.59816 | 5.04091  | -0.02144  | 1.07401  | NaN | NaN | Outlier | 6.110346  | 3.971716 |
| 79 | AGCTCAATCTCGC | 5179136 | 1.509442 | 5.941255 | 3.891171 | 3.479177 | 12.849156 | 2.079375 | 3.558239 | 4.6983 | 0 | 176.409 | 0.906366 | 1.30209 | 0.753483 | 1.970718 | 0.594486 | 3.574338 | 3.968552 | 8.895657 | 15.59816 | 1.21247  | -2.55056  | 1.149095 | NaN | NaN | Outlier | 1.564874  | 0.583619 |
| 80 | AGCTCAATCTCGC | 5179136 | 1.509442 | 5.941255 | 3.891171 | 3.479177 | 12.849156 | 2.079375 | 3.558239 | 4.6983 | 0 | 176.409 | 0.906366 | 1.30209 | 0.753483 | 1.970718 | 0.594486 | 3.574338 | 3.968552 | 8.895657 | 15.59816 | 7.29718  | -1.28463  | 1.08047  | NaN | NaN | Outlier | 10.34803  | 4.247607 |
| 81 | AGCTCAATCTCGC | 5179136 | 1.509442 | 5.941255 | 3.891171 | 3.479177 | 12.849156 | 2.079375 | 3.558239 | 4.6983 | 0 | 176.409 | 0.906366 | 1.30209 | 0.753483 | 1.970718 | 0.594486 | 3.574338 | 3.968552 | 8.895657 | 15.59816 | 0.982812 | -0.46275  | 1.05168  | NaN | NaN | Outlier | 1.075283  | 0.145252 |
| 82 | AGCTCAATCTCGC | 5179136 | 1.509442 | 5.941255 | 3.891171 | 3.479177 | 12.849156 | 2.079375 | 3.558239 | 4.6983 | 0 | 176.409 | 0.906366 | 1.30209 | 0.753483 | 1.970718 | 0.594486 | 3.574338 | 3.968552 | 8.895657 | 15.59816 | 133.1014 | -0.81438  | 1.043222 | NaN | NaN | Outlier | 134.05983 | 150.5935 |
| 83 | AGCTCAATCTCGC | 5179136 | 1.509442 | 5.941255 | 3.891171 | 3.479177 | 12.849156 | 2.079375 | 3.558239 | 4.6983 | 0 | 176.409 | 0.906366 | 1.30209 | 0.753483 | 1.970718 | 0.594486 | 3.574338 | 3.968552 | 8.895657 | 15.59816 | 1.923555 | -1.60214  | 1.06237  | NaN | NaN | Outlier | 2.12026   | 0.23088  |
| 84 | AGCTCAATCTCGC | 5179136 | 1.509442 | 5.941255 | 3.891171 | 3.479177 | 12.849156 | 2.079375 | 3.558239 | 4.6983 | 0 | 176.409 | 0.906366 | 1.30209 | 0.753483 | 1.970718 | 0.594486 | 3.574338 | 3.968552 | 8.895657 | 15.59816 | 5.94564  | -0.26211  | 1.03144  | NaN | NaN | Outlier | 6.0631    | 3.26017  |
| 85 | AGCTCAATCTCGC | 5179136 | 1.509442 | 5.941255 | 3.891171 | 3.479177 | 12.849156 | 2.079375 | 3.558239 | 4.6983 | 0 | 176.409 | 0.906366 | 1.30209 | 0.753483 | 1.970718 | 0.594486 | 3.574338 | 3.968552 | 8.895657 | 15.59816 | 5.12797  | -1.3108   | 1.068466 | NaN | NaN | Outlier | 5.358286  | 4.85297  |
| 86 | AGCTCAATCTCGC | 5179136 | 1.509442 | 5.941255 | 3.891171 | 3.479177 | 12.849156 | 2.079375 | 3.558239 | 4.6983 | 0 | 176.409 | 0.906366 | 1.30209 | 0.753483 | 1.970718 | 0.594486 | 3.574338 | 3.968552 | 8.895657 | 15.59816 | 6.26282  | -2.41029  | 1.049941 | NaN | NaN | Outlier | 6.51019   | 1.97202  |
| 87 | AGCTCAATCTCGC | 5179136 | 1.509442 | 5.941255 | 3.891171 | 3.479177 | 12.849156 | 2.079375 | 3.558239 | 4.6983 | 0 | 176.409 | 0.906366 | 1.30209 | 0.753483 | 1.970718 | 0.594486 | 3.574338 | 3.968552 | 8.895657 | 15.59816 | 7.08158  | -1.2179   | 1.039181 | NaN | NaN | Outlier | 7.101848  | 4.37876  |
| 88 | AGCTCAATCTCGC | 5179136 | 1.509442 | 5.941255 | 3.891171 | 3.479177 | 12.849156 | 2.079375 | 3.558239 | 4.6983 | 0 | 176.409 | 0.906366 | 1.30209 | 0.753483 | 1.970718 | 0.594486 | 3.574338 | 3.968552 | 8.895657 | 15.59816 | 0.90206  | -0.502064 | 1.1915   | NaN | NaN | Outlier | 0.336882  | 0.47799  |
| 89 | AGCTCAATCTCGC | 5179136 | 1.509442 | 5.941255 | 3.891171 | 3.479177 | 12.849156 | 2.079375 | 3.558239 | 4.6983 | 0 | 176.409 | 0.906366 | 1.30209 | 0.753483 | 1.970718 | 0.594486 | 3.574338 | 3.968552 | 8.895657 | 15.59816 | 0.494186 | -0.50282  | 1.18478  | NaN | NaN | Outlier | 0.502321  | 0.48514  |
| 90 | AGCTCAATCTCGC | 5179136 | 1.509442 | 5.941255 | 3.891171 | 3.479177 | 12.849156 | 2.079375 | 3.558239 | 4.6983 | 0 | 176.409 | 0.906366 | 1.30209 | 0.753483 | 1.970718 | 0.594486 | 3.574338 | 3.968552 | 8.895657 | 15.59816 | 1.923555 | -1.60214  | 1.06237  | NaN | NaN | Outlier | 2.12026   | 0.23088  |
| 91 | AGCTCAATCTCGC | 5179136 | 1.509442 | 5.941255 | 3.891171 | 3.479177 | 12.849156 | 2.079375 | 3.558239 | 4.6983 | 0 | 176.409 | 0.906366 | 1.30209 | 0.753483 | 1.970718 | 0.594486 | 3.574338 | 3.968552 | 8.895657 | 15.59816 | 1.97535  | -0.92346  | 1.07253  | NaN | NaN | Outlier | 2.05723   | 1.26358  |
| 92 | AGCTCAATCTCGC | 5179136 | 1.509442 | 5.941255 | 3.891171 | 3.479177 | 12.849156 | 2.079375 | 3.558239 | 4.6983 | 0 | 176.409 | 0.906366 | 1.30209 | 0.753483 | 1.970718 | 0.594486 | 3.574338 | 3.968552 | 8.895657 | 15.59816 | 0.19118  | -0.32588  | 1.08289  | NaN | NaN | Outlier | 0.21668   | 0.16669  |
| 93 | AGCTCAATCTCGC | 5179136 | 1.509442 | 5.941255 | 3.891171 | 3.479177 | 12.849156 | 2.079375 | 3.558239 | 4.6983 | 0 | 176.409 | 0.906366 | 1.30209 | 0.753483 | 1.970718 | 0.594486 | 3.574338 | 3.968552 | 8.895657 | 15.59816 | 15.40046 | -0.65316  | 1.04316  | NaN | NaN | Outlier | 16.84454  | 11.96475 |
| 94 | AGCTCAATCTCGC | 5179136 | 1.509442 | 5.941255 | 3.891171 | 3.479177 | 12.849156 | 2.079375 | 3.558239 | 4.6983 | 0 | 176.409 | 0.906366 | 1.30209 | 0.753483 | 1.970718 | 0.594486 | 3.574338 | 3.968552 | 8.895657 | 15.59816 | 50.76156 | -0.88014  | 1.03641  | NaN | NaN | Outlier | 52.76156  | 36.05614 |
| 95 | AGCTCAATCTCGC | 5179136 | 1.509442 | 5.941255 | 3.891171 | 3.479177 | 12.849156 | 2.079375 | 3.558239 | 4.6983 | 0 | 176.409 | 0.906366 | 1.30209 | 0.753483 | 1.970718 | 0.594486 | 3.574338 | 3.968552 | 8.895657 | 15.59816 | 5.94139  | -1.27198  | 1.06440  | NaN | NaN | Outlier | 6.347591  | 4.602566 |
| 96 | AGCTCAATCTCGC | 5179136 | 1.509442 | 5.941255 | 3.891171 | 3.479177 | 12.849156 | 2.079375 | 3.558239 | 4.6983 | 0 | 176.409 | 0.906366 | 1.30209 | 0.753483 | 1.970718 | 0.594486 | 3.574338 | 3.968552 | 8.895657 | 15.59816 | 0.92821  | -0.98749  | 1.05223  | NaN | NaN | Outlier | 1.038487  | 0.61217  |
| 97 | AGCTCAATCTCGC | 5179136 | 1.509442 | 5.941255 | 3.891171 | 3.479177 | 12.849156 | 2.079375 | 3.558239 | 4.6983 | 0 | 176.409 | 0.906366 | 1.30209 | 0.753483 | 1.970718 | 0.594486 | 3.574338 | 3.968552 | 8.895657 | 15.59816 | 26.60088 | -0.06901  | 1.044031 | NaN | NaN | Outlier | 27.15746  | 16.0429  |
| 98 | AGCTCAATCTCGC | 5179136 | 1.509442 | 5.941255 | 3.891171 | 3.479177 | 12.849156 | 2.079375 | 3.558239 | 4.6983 | 0 | 176.409 | 0.906366 | 1.30209 | 0.753483 | 1.970718 | 0.594486 | 3.574338 | 3.968552 | 8.895657 | 15.59816 | 10.16554 | -0.56147  | 1.04118  | NaN | NaN | Outlier | 10.55987  | 6.77001  |
| 99 | AGCTCAATCTCGC | 5179136 | 1.509442 | 5.941255 | 3.891171 | 3.479177 | 12.849156 | 2.079375 | 3.558239 | 4.6983 | 0 | 176.409 | 0.906366 | 1.30209 | 0.753483 | 1.970718 | 0.594486 | 3.574338 | 3.968552 | 8.895657 | 15.59816 | 20.2499  | -0.52467  | 1.03709  | NaN | NaN | Outlier | 21.12063  | 14.25164 |
| 10 |               |         |          |          |          |          |           |          |          |        |   |         |          |         |          |          |          |          |          |          |          |          |           |          |     |     |         |           |          |







|    |                |          |          |          |          |          |          |          |          |          |          |          |          |          |          |          |          |          |          |          |          |          |          |          |          |          |          |          |          |          |          |          |
|----|----------------|----------|----------|----------|----------|----------|----------|----------|----------|----------|----------|----------|----------|----------|----------|----------|----------|----------|----------|----------|----------|----------|----------|----------|----------|----------|----------|----------|----------|----------|----------|----------|
| 12 | TCCTATGACGACTG | 0        | 1.509442 | 1.485314 | 0.980798 | 0        | 2.569832 | 1.039688 | 1.186176 | 2.34915  | 0        | 0        | 0.996036 | 0.665145 | 0        | 1.478038 | 0        | 0        | 1.322851 | 1.098841 | 0        | 1.239066 | -0.89973 | 1.142553 | 0.431007 | NaN      | Low      | 1.613379 | 0.864752 |          |          |          |
| 12 | TGCATCACTACTC  | 1.035827 | 0        | 10.3972  | 3.891771 | 0        | 2.569832 | 2.079375 | 1.186176 | 0        | 1.770725 | 2.164428 | 0        | 0.665145 | 0.376742 | 0.985359 | 1.783457 | 1.191446 | 1.322851 | 1.098841 | 0        | 1.629599 | -1.38812 | 1.072299 | 0.195482 | NaN      | Low      | 2.352947 | 0.898997 |          |          |          |
| 12 | TGCATCACTACTC  | 1.179136 | 6.037769 | 47.33004 | 18.84384 | 0        | 2.569832 | 2.079375 | 1.186176 | 4.6983   | 0        | 2.164428 | 6.972252 | 2.868587 | 0.376742 | 0.985359 | 4.1614   | 1.191446 | 3.968552 | 2.197828 | 0.399953 | 6.255058 | -1.74401 | 1.038777 | 0.092256 | NaN      | Low      | 9.475324 | 2.828754 |          |          |          |
| 12 | TGCATCACTACTC  | 0.322444 | 4.528326 | 32.6769  | 18.16316 | 10.43753 | 2.569832 | 2.158448 | 22.57335 | 2.34915  | 2.656087 | 6.491285 | 10.9564  | 9.977173 | 3.01933  | 3.941436 | 6.539043 | 3.282892 | 9.259954 | 6.593045 | 0.399953 | 8.409753 | -1.28895 | 0.828883 | 0.119953 | NaN      | Low      | 12.0628  | 4.936704 |          |          |          |
| 12 | TTGGTATCTACTG  | 0        | 1.509442 | 0        | 0        | 0        | 0        | 0        | 0        | 0        | 0        | 0        | 0        | 0.986304 | 0        | 0        | 0        | 0        | 0        | 0        | 0        | 0        | 0        | 0        | 0        | 0        | 0        | 0        | 0        | 0.799905 |          |          |
| 13 | GCACTCACTACTG  | 2.071654 | 1.509442 | 7.426569 | 1.297257 | 0        | 0        | 2.079375 | 3.585829 | 0        | 0        | 1.082214 | 3.984144 | 0.997177 | 0.376742 | 0        | 2.972429 | 2.382892 | 0        | 1.098841 | 0        | 1.54189  | -1.29827 | 1.099357 | 0.235321 | NaN      | Low      | 2.192344 | 0.891437 |          |          |          |
| 13 | GCACTCACTACTG  | 0        | 3.018884 | 4.455941 | 1.297257 | 0        | 0        | 1.551751 | 3.585829 | 0        | 0        | 3.246643 | 0.996036 | 2.65608  | 0        | 2.463397 | 2.377943 | 0        | 2.645701 | 0        | 0        | 1.543983 | -1.4804  | 1.159298 | 0.032139 | NaN      | Low      | 2.618707 | 2.602959 |          |          |          |
| 13 | GGAGCCCGGGGG   | 1.035827 | 1.509442 | 14.85314 | 1.297257 | 0        | 0        | 2.328126 | 2.372353 | 0        | 1.770725 | 5.411071 | 0.996036 | 0.332572 | 0        | 0        | 0        | 1.191446 | 0        | 0        | 0        | 2.419818 | 1.001902 | 1.125945 | 0.374372 | NaN      | Low      | 6.131066 | 3.226566 |          |          |          |
| 44 | GAGCCCGGGGG    | 0        | 1.509442 | 43.0741  | 3.891771 | 2.569832 | 18.71438 | 4.744705 | 1.174575 | 0        | 4.328857 | 3.984144 | 1.33029  | 1.883708 | 0        | 0.594486 | 3.574338 | 7.937103 | 71.42465 | 1.198858 | 8.770771 | 2.019701 | 1.071624 | 0.059469 | NaN      | Low      | 3.470138 | 1.0714   |          |          |          |          |
| 44 | GGATCGCTGGGA   | 9.322444 | 3.018884 | 0        | 3.891771 | 20.87506 | 25.69832 | 8.317501 | 18.97882 | 1.174575 | 4.426812 | 12.98657 | 14.94054 | 2.993152 | 10.92551 | 21.18522 | 4.755886 | 42.89206 | 6.614253 | 30.76754 | 11.99858 | 12.78818 | 0.749802 | 0.816418 | 0.358407 | 0.504122 | OK       | 9.537855 | 16.0385  |          |          |          |
| 45 | AGCCCGGGGGGG   | 2.071654 | 1.509442 | 109.3258 | 34.79177 | 15.41899 | 38.98907 | 24.90787 | 11.74575 | 3.5445   | 22.7265  | 31.87315 | 6.118876 | 3.990674 | 0.482679 | 1.783457 | 9.315168 | 10.5828  | 172.518  | 2.999716 | 28.97413 | 1.530575 | 1.023697 | NaN      | NaN      | Outlier  | 14.90052 | 43.04775 |          |          |          |          |
| 45 | GATCGCTGGGAG   | 0        | 1.485314 | 0        | 3.479177 | 0        | 2.079375 | 2.372353 | 0        | 0        | 2.164428 | 0.996036 | 0.753483 | 0.985359 | 4.755886 | 1.191446 | 0        | 0        | 0        | 0        | 0        | 0.996036 | -2.06681 | 1.895259 | 0.079898 | NaN      | Low      | 1.608122 | 0.384075 |          |          |          |
| 45 | GATCGCTGGGAG   | 6.219693 | 3.018884 | 4.455941 | 11.67531 | 34.79177 | 20.58666 | 1.998438 | 15.42029 | 3.523725 | 7.966262 | 9.739928 | 7.968287 | 2.993152 | 9.418539 | 20.19986 | 7.728315 | 21.44603 | 5.291402 | 28.56986 | 6.399244 | 11.62904 | 0.636717 | 0.79955  | 0.348774 | 0.95521  | OK       | 9.103727 | 14.15436 |          |          |          |
| 45 | GGATCAATGTCAC  | 0        | 4.528326 | 0        | 3.479177 | 0        | 2.079375 | 3.585829 | 0        | 0.885362 | 3.246643 | 0        | 0.997177 | 2.637191 | 0.985359 | 2.377943 | 0        | 2.645701 | 2.197682 | 1.198858 | 1.865257 | -1.5015  | 0.930411 | 0.871797 | NaN      | Low      | 1.962232 | 1.758283 |          |          |          |          |
| 46 | ATCGCTGGGAGT   | 13.46575 | 19.62735 | 8.911883 | 22.05337 | 24.35404 | 35.97765 | 3.957189 | 20.165   | 5.872875 | 3.12175  | 4.328857 | 10.9564  | 3.211159 | 8.288315 | 19.70718 | 3.50372  | 15.4888  | 5.291402 | 19.77913 | 7.599102 | 13.36018 | 0.508776 | 0.628351 | 0.925474 | 0.955515 | OK       | 13.08807 | 13.63229 |          |          |          |
| 46 | ATCGCTGGGAGT   | 5.179136 | 12.07554 | 1.485314 | 1.589028 | 0        | 5.139665 | 10.93688 | 5.930882 | 3.523725 | 0.885362 | 0        | 0.996036 | 0.665145 | 0        | 1.478038 | 0        | 1.191446 | 0        | 0        | 0        | 2.345876 | -1.52047 | 1.180022 | 0.167189 | NaN      | Low      | 2.485277 | 1.206476 |          |          |          |
| 46 | ATCGCTGGGAGT   | 6.219693 | 1.509442 | 1.485314 | 1.297257 | 0        | 0        | 3.585829 | 1.174575 | 0        | 0        | 0        | 0        | 0        | 0        | 0        | 0        | 0        | 0        | 0        | 0.870844 | -1.56135 | 1.159413 | 0.15077  | NaN      | Low      | 1.300899 | 0.440789 |          |          |          |          |
| 46 | ATCGCTGGGAGT   | 0        | 0        | 0        | 0        | 0        | 0        | 0        | 0        | 0        | 0        | 0        | 0        | 0        | 0        | 0        | 0        | 0        | 0        | 0        | 0.363891 | -0.05729 | 0.435474 | 0.895338 | NaN      | Low      | 0.371115 | 0.356667 |          |          |          |          |
| 47 | ATAAATGTCACCA  | 3.107481 | 6.037769 | 1.485314 | 3.891771 | 0        | 0        | 1.998438 | 1.186176 | 0        | 0.885362 | 5.411071 | 0        | 1.33029  | 3.990674 | 1.478038 | 1.188971 | 5.95723  | 1.322851 | 1.098841 | 0.399953 | 2.168512 | -1.43719 | 0.969563 | 0.091534 | NaN      | Low      | 3.167363 | 1.03666  |          |          |          |
| 47 | TCCTGGGCTCCAG  | 0        | 0        | 0        | 0        | 0        | 0        | 0        | 0        | 0        | 0        | 0        | 0        | 0        | 0        | 0        | 0        | 0        | 0        | 0        | 0.075028 | -1.06405 | 0.691405 | 0.812448 | NaN      | Low      | 1.575962 | 0.140181 |          |          |          |          |
| 47 | TCCTGGGCTCCAG  | 0        | 1.485314 | 0        | 3.479177 | 0        | 0.103968 | 0        | 1.174575 | 0        | 0        | 1.920072 | 0.665145 | 1.883708 | 1.478038 | 0.594486 | 0        | 0        | 0        | 0        | 0        | 0.68961  | -1.83909 | 1.188726 | 0.112138 | NaN      | Low      | 1.077938 | 0.301282 |          |          |          |
| 47 | TCCTGGGCTCCAG  | 0        | 6.037769 | 0        | 2.594514 | 0        | 0        | 0        | 0        | 0        | 0        | 1.082214 | 3.984144 | 1.995435 | 1.506966 | 0.492679 | 0        | 0        | 0        | 0        | 0        | 0.884686 | -1.56993 | 1.193419 | 0.188346 | NaN      | Low      | 1.323563 | 0.458089 |          |          |          |
| 47 | TCCTGGGCTCCAG  | 9.322444 | 13.58498 | 4.455941 | 15.56708 | 17.39588 | 12.84916 | 6.238126 | 8.303235 | 4.6983   | 4.426812 | 3.246643 | 1.920072 | 1.990689 | 5.651124 | 11.31363 | 8.3228   | 11.91446 | 3.968552 | 16.48261 | 4.799443 | 8.427108 | 0.347979 | 0.592862 | 0.557239 | NaN      | Low      | 7.415695 | 9.438521 |          |          |          |
| 47 | TCCTGGGCTCCAG  | 11.3941  | 13.58498 | 4.455941 | 15.56708 | 3.479177 | 7.709497 | 4.159751 | 7.117058 | 5.872875 | 0.885362 | 0        | 0.996036 | 0.997177 | 0        | 1.478038 | 0        | 1.191446 | 0        | 0        | 0        | 0.075028 | -1.06405 | 0.691405 | 0.812448 | NaN      | Low      | 2.485277 | 1.206476 |          |          |          |
| 48 | TCCTGGGCTCCAG  | 0        | 0        | 0        | 0        | 0        | 0        | 0        | 0        | 0        | 0        | 1.082214 | 0        | 0        | 0        | 0        | 0        | 0        | 0        | 0        | 0        | 0.885362 | 0        | 0        | 0        | 0        | 0        | 0        | 0        | 0.753483 | 0.492679 | 0.594486 |
| 48 | TCCTGGGCTCCAG  | 0        | 12.07554 | 4.455941 | 5.189028 | 3.479177 | 0        | 0        | 10.67559 | 2.34915  | 0.885362 | 0        | 0.665145 | 0.376742 | 0        | 0        | 0        | 0        | 0        | 0        | 0        | 2.370123 | -1.99946 | 1.189497 | 0.091534 | NaN      | Low      | 3.791915 | 0.948331 |          |          |          |
| 48 | TCCTGGGCTCCAG  | 8.286617 | 10.56609 | 0        | 3.891771 | 6.958353 | 5.139665 | 1.039688 | 7.117058 | 0        | 1.082214 | 0        | 0.332572 | 0        | 0.492679 | 0.594486 | 0        | 0        | 0        | 0.399953 | 2.255058 | -1.6202  | 1.160074 | 0.165782 | NaN      | Low      | 3.463481 | 1.226354 |          |          |          |          |
| 48 | TCCTGGGCTCCAG  | 0        | 0        | 2.970628 | 1.898028 | 0        | 0        | 0        | 13.04794 | 1.174575 | 0        | 0        | 0.996036 | 0.997177 | 1.130225 | 0        | 0        | 1.191446 | 0        | 0        | 0.799905 | 1.374875 | -0.84789 | 1.187692 | 0.475291 | NaN      | Low      | 1.767469 | 0.9821   |          |          |          |
| 48 | TCCTGGGCTCCAG  | 1.035827 | 0        | 22.27971 | 28.33965 | 3.479177 | 5.139665 | 1.039688 | 23.72353 | 5.872875 | 2.656087 | 1.082214 | 0.996036 | 1.658287 | 1.130225 | 1.970718 | 0.594486 | 1.191446 | 3.968552 | 1.098841 | 1.999764 | 5.572839 | -1.36567 | 1.038485 | 0.186514 | NaN      | Low      | 8.029711 | 3.115967 |          |          |          |
| 48 | TCCTGGGCTCCAG  | 1.035827 | 3.018884 | 5.941255 | 1.297257 | 0        | 2.569832 | 0        | 2.372353 | 4.6983   | 0.885362 | 0        | 0.997177 | 1.506966 | 3.448756 | 0        | 0        | 3.968552 | 0        | 1.396622 | 1.747034 | 0.053086 | 1.011057 | 0.192528 | NaN      | Low      | 1.714895 | 1.799723 |          |          |          |          |
| 48 | TCCTGGGCTCCAG  | 2.071654 | 0        | 7.426569 | 0.980798 | 3.479177 | 0        | 2.079375 | 24.90787 | 1.174575 | 0.885362 | 2.164428 | 1.920072 | 6.650414 | 1.130225 | 3.941436 | 3.560914 | 1.191446 | 3.968552 | 0        | 2.399716 | 1.805901 | -1.21096 | 0.977466 | 0.215239 | NaN      | Low      | 5.315572 | 2.296229 |          |          |          |
| 48 | TCCTGGGCTCCAG  | 1.035827 | 0        | 10.3972  | 12.97257 | 0        | 2.569832 | 1.039688 | 16.60647 | 0        | 1.770725 | 2.164428 | 0.996036 | 4.885857 | 0.376742 | 2.463397 | 5.11772  | 1.191446 | 2.645701 | 1.198811 | 0.159681 | 3.616511 | -1.48975 | 1.048883 | 0.155818 | NaN      | Low      | 5.333768 | 1.899214 |          |          |          |
| 48 | TCCTGGGCTCCAG  | 0        | 1.485314 | 3.891771 | 0        | 0        | 0        | 0        | 7.117058 | 0        | 0        | 0        | 0.665145 | 0        | 0        | 0.594486 | 0        | 0        | 0        | 0.399953 | 0.707866 | -0.60894 | 1.177204 | 0.604964 | NaN      | Low      | 0.854859 | 0.60513  |          |          |          |          |
| 48 | TTAGCCCGGGGG   | 0        | 0        | 0        | 0        | 0        | 0        | 0        | 0        | 0        | 0        | 0        | 0        | 0        | 0        | 0        | 0        | 0        | 0        | 0        | 0.119986 | 1.59701  | 1.47847  | 0.280153 | NaN      | Low      | 0.059618 | 1.80354  |          |          |          |          |
| 49 | AAATGTCACCACT  | 1.035827 | 4.528326 | 1.485314 | 0        | 0        | 7.709497 | 15.95831 | 3.585829 | 2.34915  | 0.885362 | 16.2321  | 2.88018  | 2.99152  | 4.89764  | 0.492679 | 1.783457 | 39.3177  | 11.90562 | 23.07566 | 3.999575 | 7.221709 | 0.794723 | 0.986661 | 0.420545 | NaN      | Low      | 5.281451 | 9.316187 |          |          |          |
| 49 | TCCTGGGCTCCAG  | 8.286617 | 19.62275 | 0        | 7.783454 | 0        | 10.27933 | 4.159751 | 11.86376 | 8.232024 | 2.656087 | 6.164428 | 9.96035  | 7.316594 | 5.651124 | 7.93019  | 3.350372 |          |          |          |          |          |          |          |          |          |          |          |          |          |          |          |
