# Supplementary material for: MicroRNA determinants of neuroendocrine differentiation in metastatic castration-resistant prostate cancer
Source: Springer Nature journal article supplement (doi:10.1038/s41388-020-01493-8), 2020-10-09
Supplement: 41388_2020_1493_MOESM14_ESM.pdf [file 41388_2020_1493_MOESM14_ESM.pdf]

| Primer                                  | Sequence (5'-3')                               |
|-----------------------------------------|------------------------------------------------|
| <i>AURKA</i> _miR-363_sense             | AAACTAGCGGCCGCTAGTATCAGTTAAGGAGCTGTGCAATAT     |
| <i>AURKA</i> _miR-363_antisense         | CTAGATATTGCACAGCTCCTTAACTCATACTAGCGGCCGCTAGTTT |
| Mutant <i>AURKA</i> _miR-363_sense      | AAACTAGCGGCCGCTAGTATCAGTTAAGGAGCTGAAGTCTAT     |
| Mutant <i>AURKA</i> _miR-363_antisense  | CTAGATAGACTTCAGCTCCTTAACTGATACTAGCGGCCGCTAGTTT |
| <i>KLF4-1</i> _miR-363_sense            | AAACTAGCGGCCGCTAGTTGAATTGTGTATTGATGCAATATT     |
| <i>KLF4-1</i> _miR-363_antisense        | CTAGAATATTGCATCAATACACAATTCAACTAGCGGCCGCTAGTTT |
| <i>KLF4-2</i> _miR-363_sense            | AAACTAGCGGCCGCTAGTACTGTGGTTTCAGATGTGCAATATTAT  |
| <i>KLF4-2</i> _miR-363_antisense        | CTAGATATTGCACATCTGAAACCACAGTACTAGCGGCCGCTAGTTT |
| Mutant <i>KLF4-1</i> _miR-363_sense     | AAACTAGCGGCCGCTAGTTGAATTGTGTATTGATGGTCAATT     |
| Mutant <i>KLF4-1</i> _miR-363_antisense | CTAGAATTGACCATCAATACACAATTCAACTAGCGGCCGCTAGTTT |
| Mutant <i>KLF4-2</i> _miR-363_sense     | AAACTAGCGGCCGCTAGTACTGTGGTTTCAGATGTGCAATAT     |
| Mutant <i>KLF4-2</i> _miR-363_antisense | CTAGATTGCACATCTGAAACCACAGTACTAGCGGCCGCTAGTTT   |

|  |  |
|--|--|
|  |  |
|--|--|
