# Supplementary figures and images for: MicroRNA determinants of neuroendocrine differentiation in metastatic castration-resistant prostate cancer
Source: Springer Nature journal article supplement (doi:10.1038/s41388-020-01493-8), 2020-10-09

**Fig. S1 Histology of CRPC-Adeno and CRPC-NE tissues**

**CRPC-Adeno**

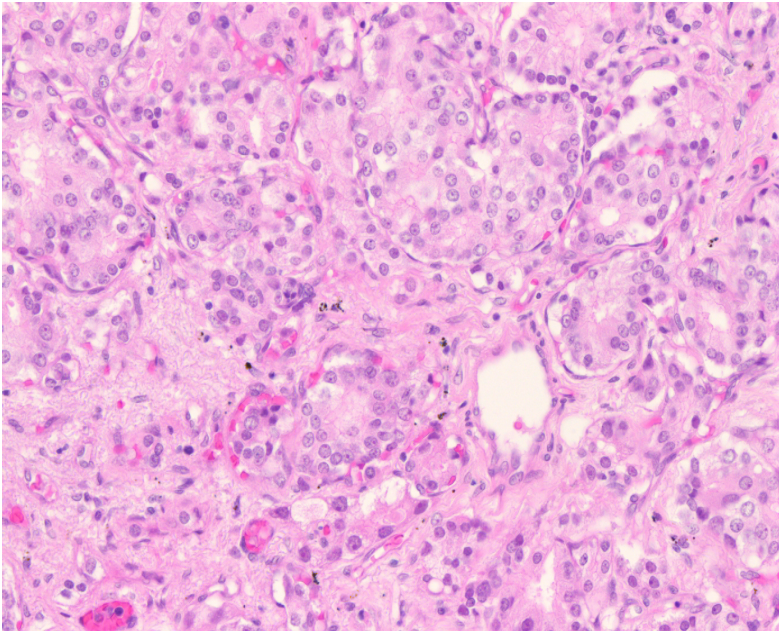

**CRPC-NE**

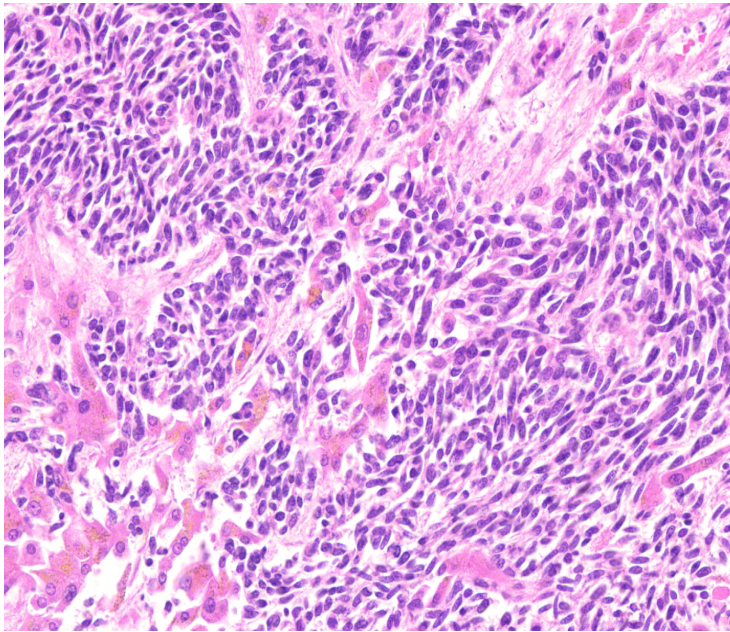

Supplement: 41388_2020_1493_MOESM1_ESM.pdf [file 41388_2020_1493_MOESM1_ESM.pdf]

**Fig. S2 Average distribution of small RNA reads in sequenced samples (related to Fig. 1)**

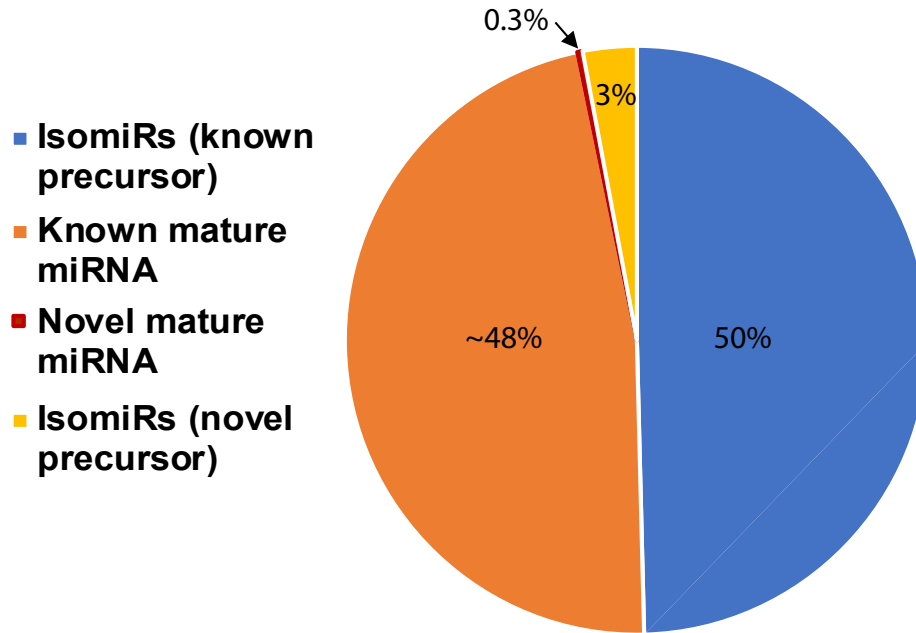

Supplement: 41388_2020_1493_MOESM2_ESM.pdf [file 41388_2020_1493_MOESM2_ESM.pdf]

Fig. S3 Principal Component Analyses for CRPC-Adeno and CRPC-NE based on piRNAs

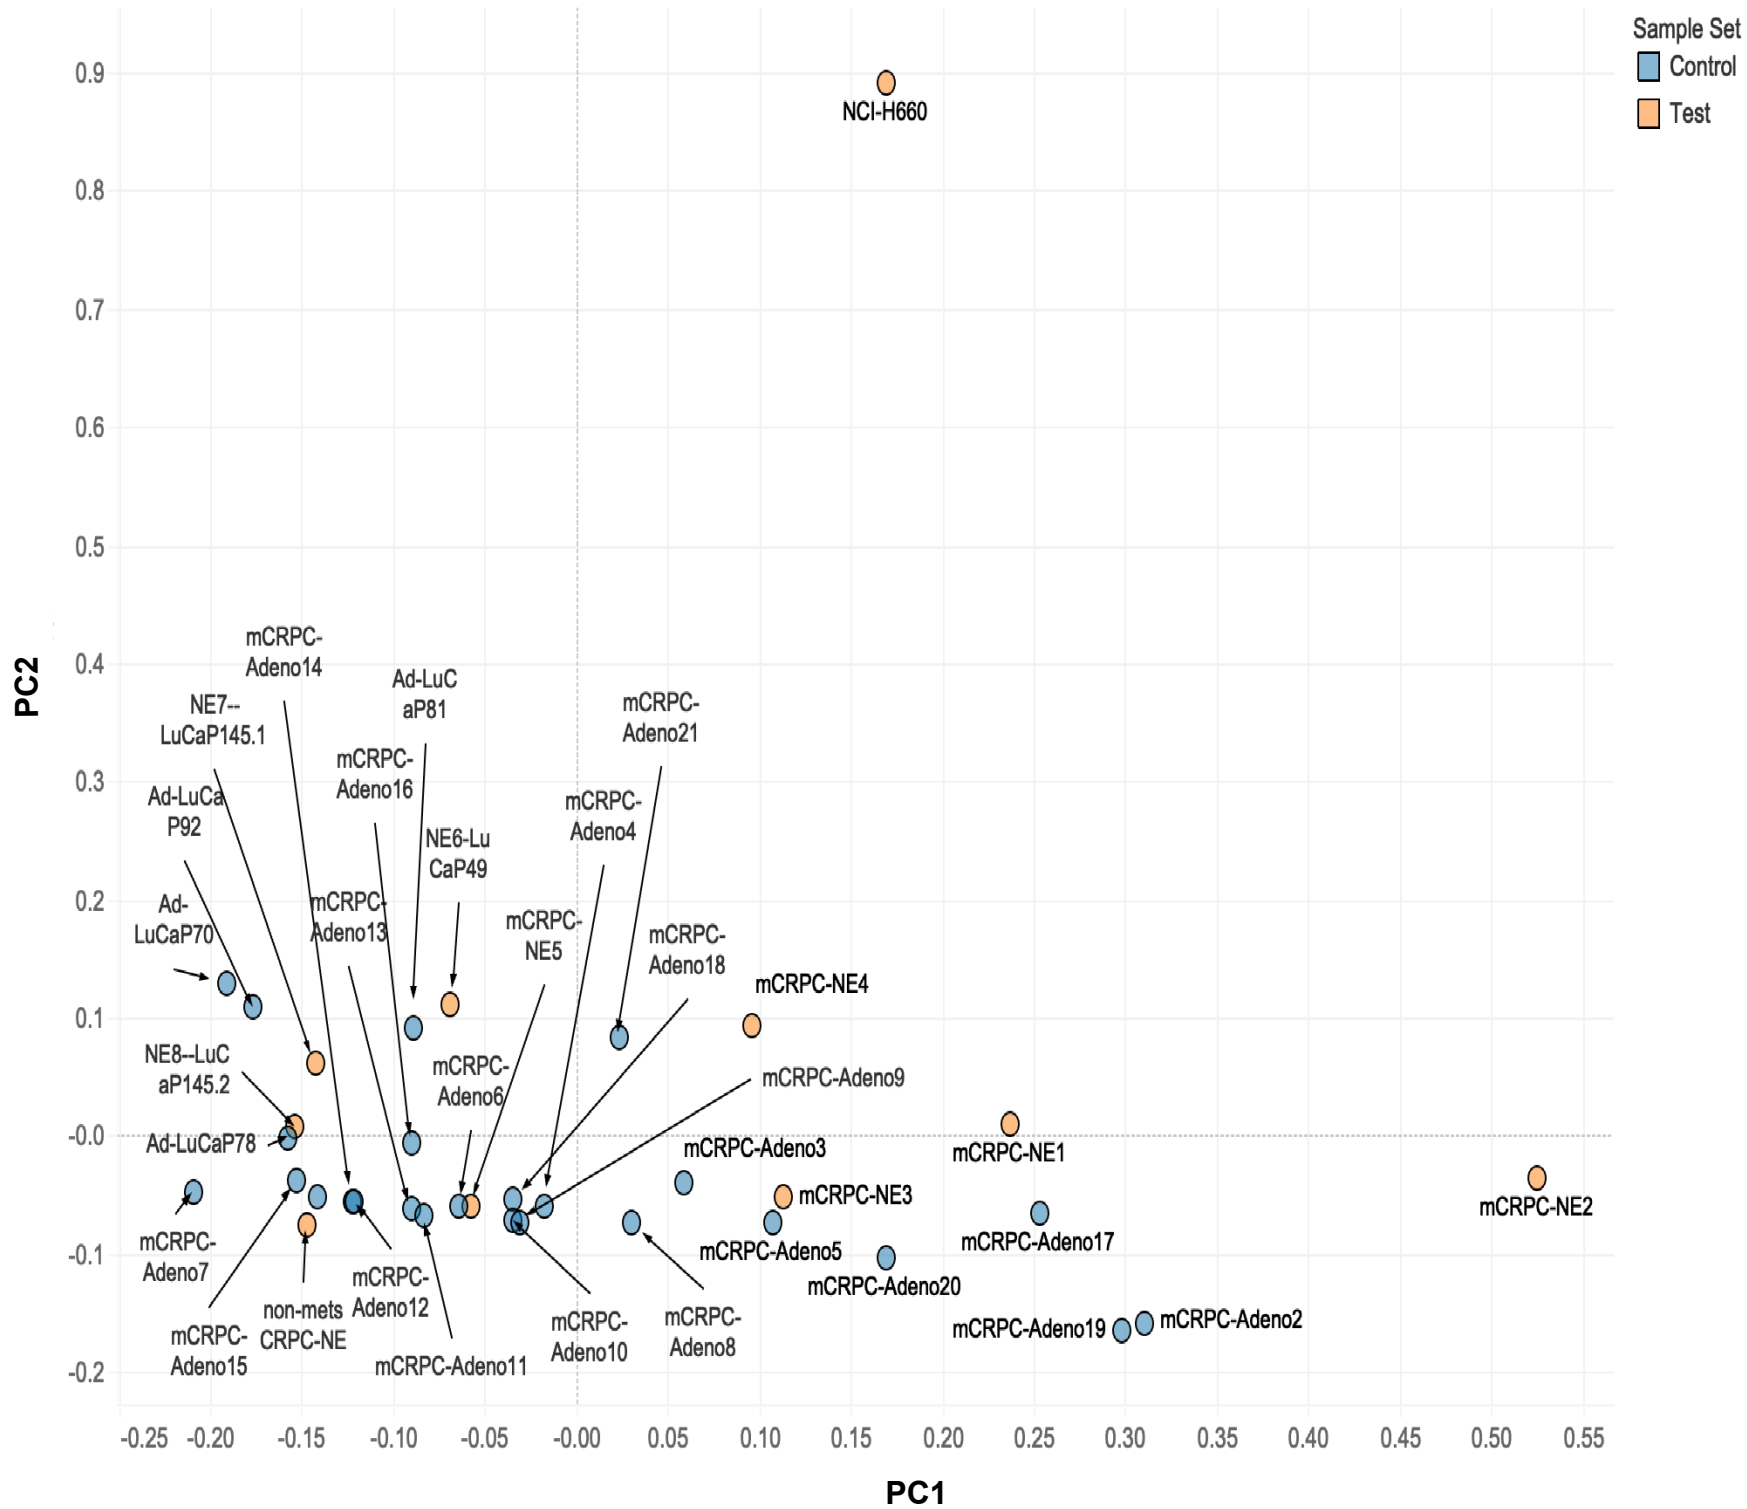

Supplement: 41388_2020_1493_MOESM3_ESM.pdf [file 41388_2020_1493_MOESM3_ESM.pdf]

**Fig. S5 Performance of miRNA classifier in validation cohort of mCRPC patients**

**A**

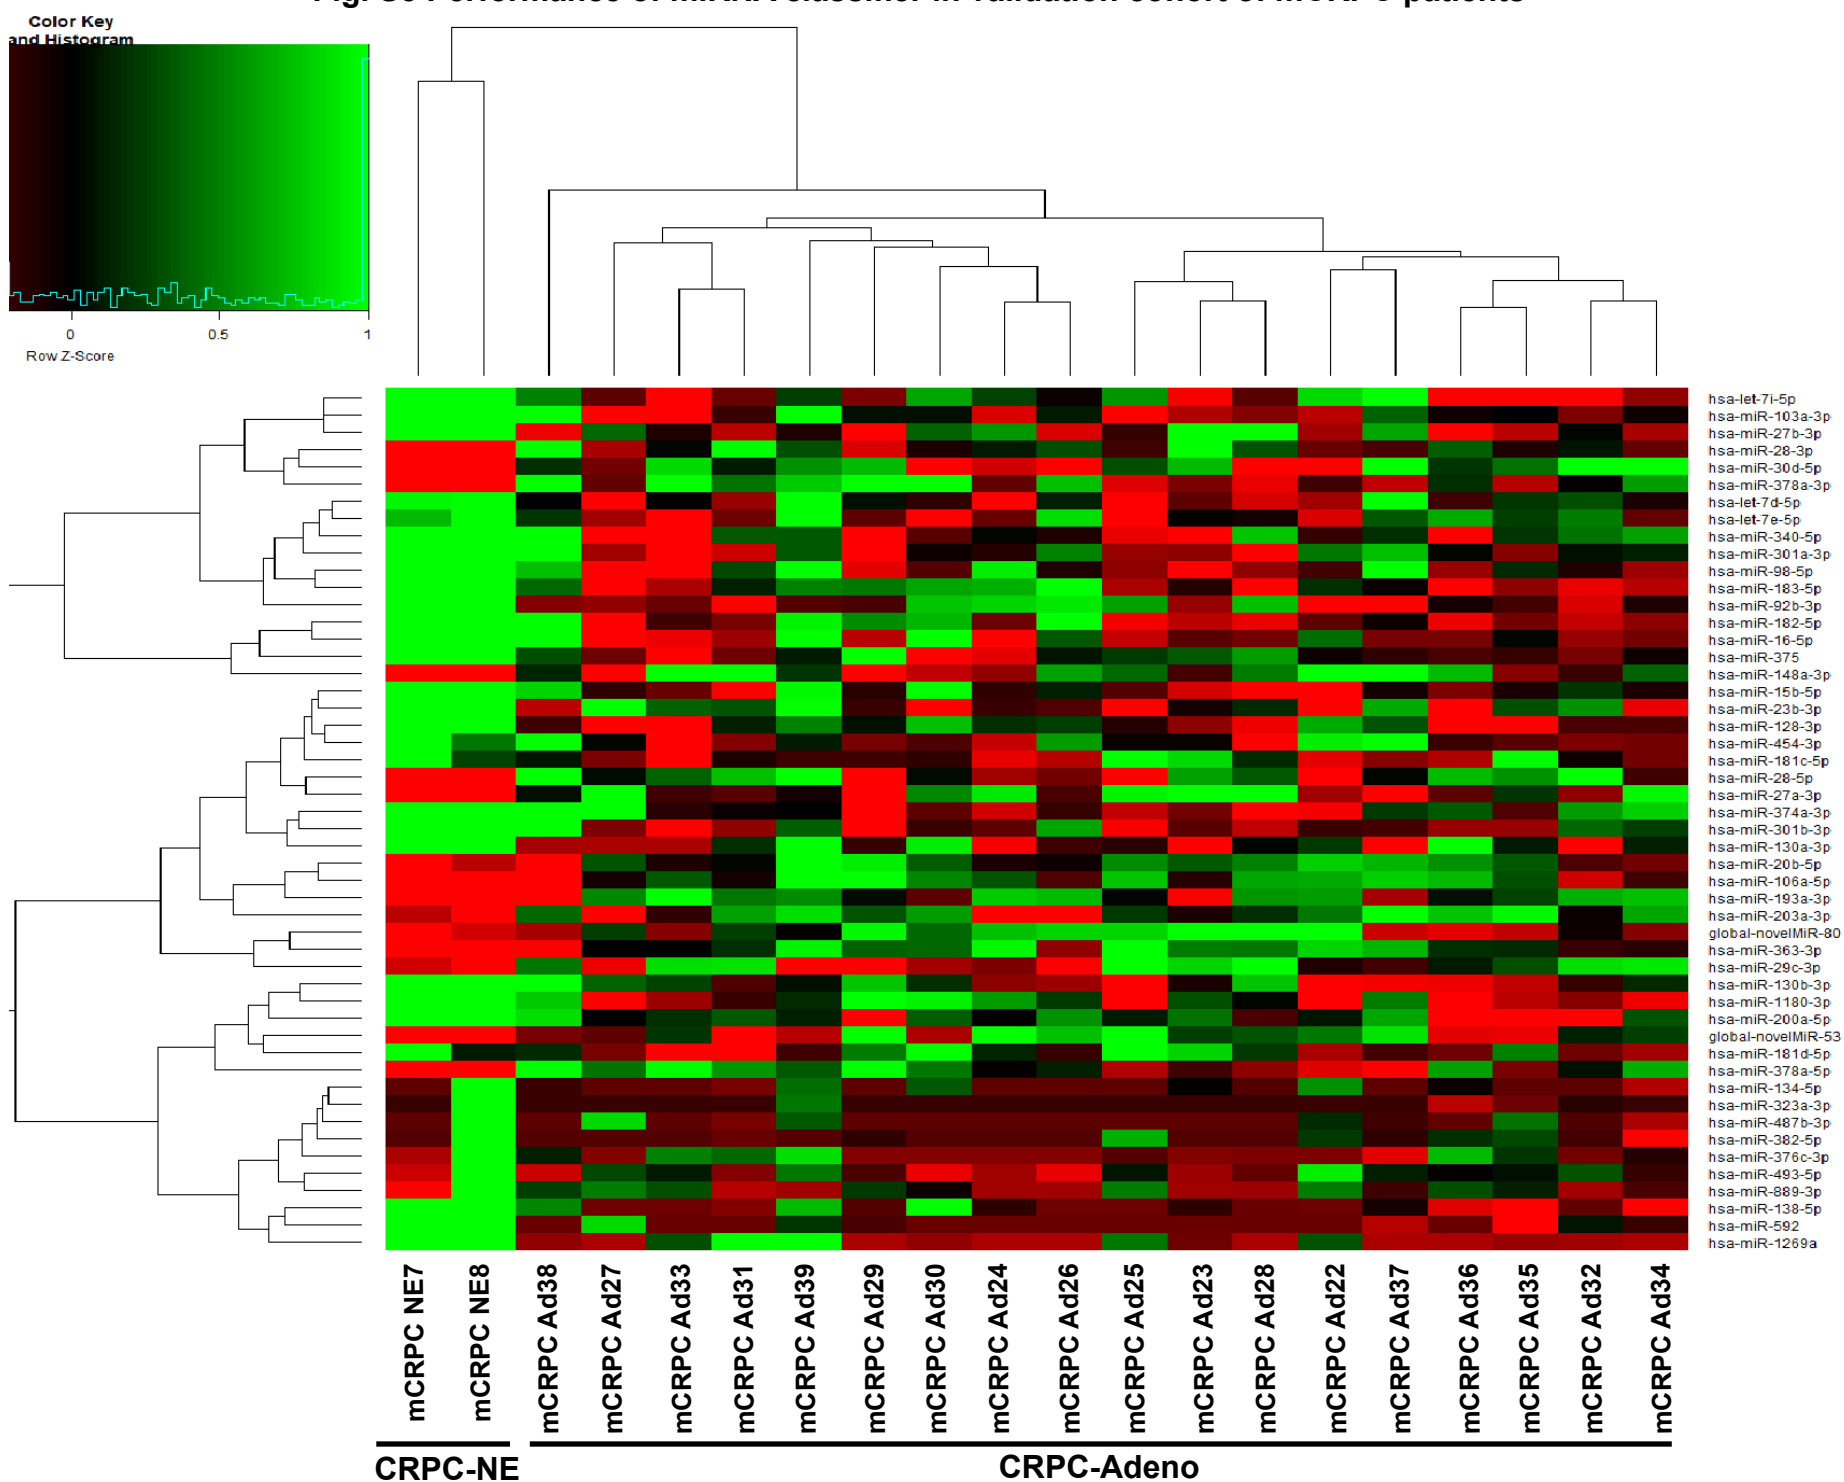

**B**

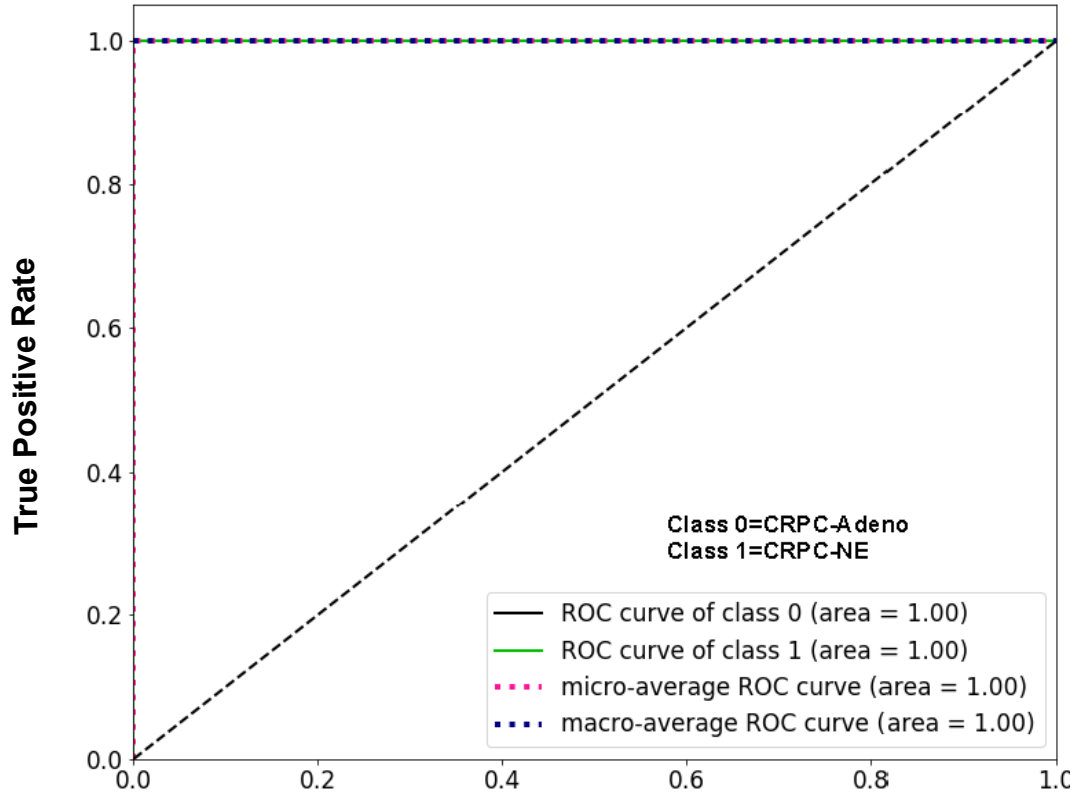

Supplement: 41388_2020_1493_MOESM5_ESM.pdf [file 41388_2020_1493_MOESM5_ESM.pdf]

**Fig. S6 Application of 'miRNA classifier' to Taylor *et al.* dataset of prostate adenocarcinomas**

**A**

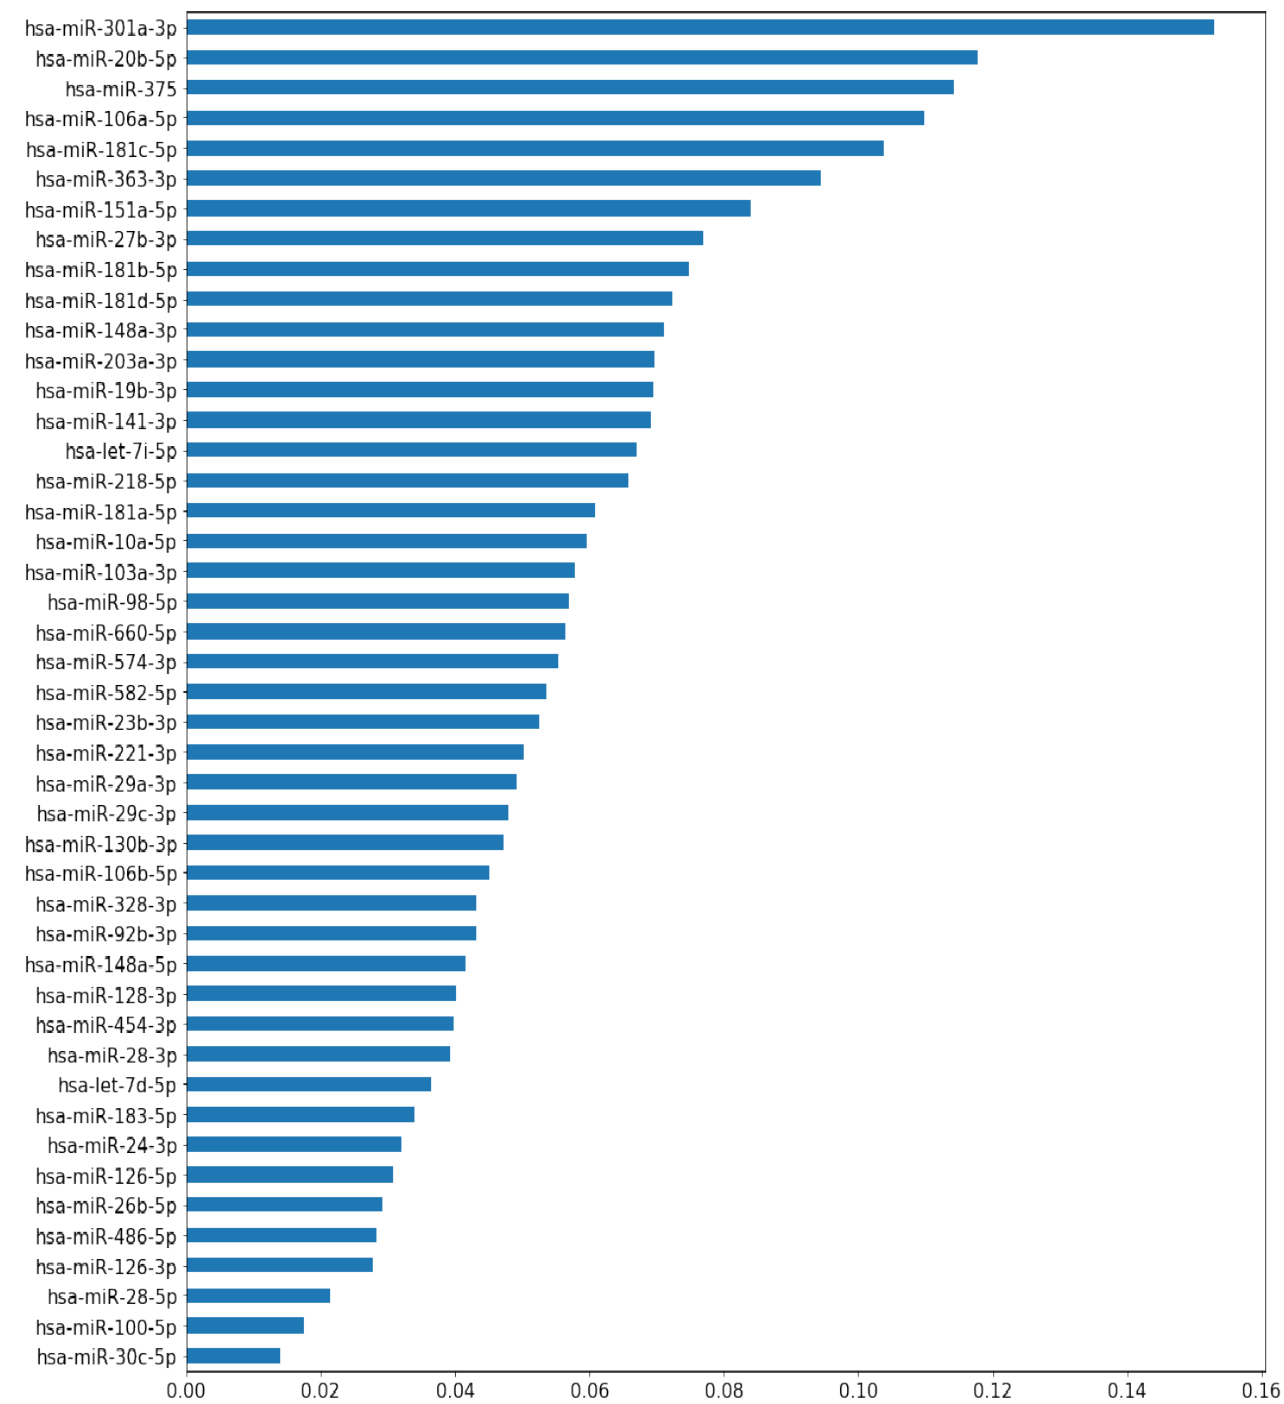

**B**

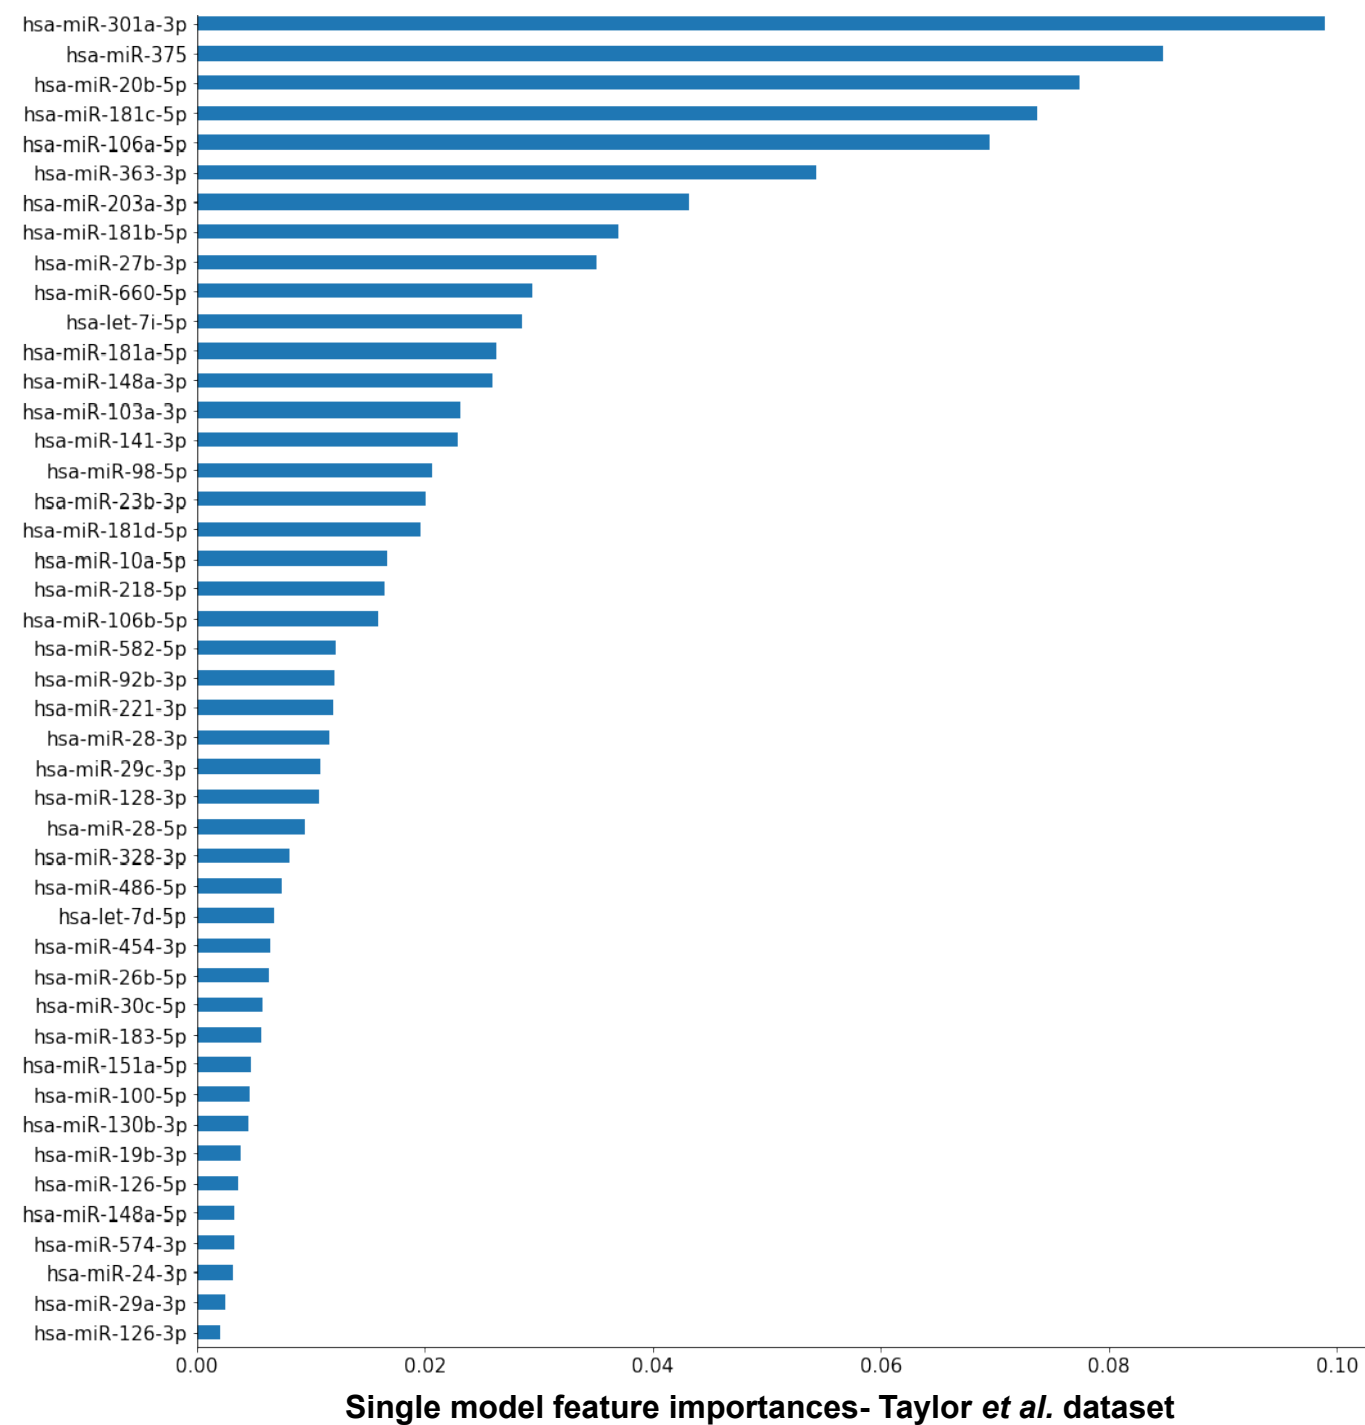

Supplement: 41388_2020_1493_MOESM6_ESM.pdf [file 41388_2020_1493_MOESM6_ESM.pdf]
